# Supplementary material
Source: MDPI journal article supplement (https://www.mdpi.com/2071-1050/13/14/7655)
Supplement: s1 [file s1]

**Table S1: Time series data of mosquito populations in the study area along with environmental factors examined (LST, NDVI, Altitude, Water area)**

| LOCATION      | DATE     | TOTAL<br>NUMBER OF<br>MOSQUITOS | LST<br>(°K) | NDVI  | ALTITUDE<br>(m) | WATER AREA<br>km <sup>2</sup> |
|---------------|----------|---------------------------------|-------------|-------|-----------------|-------------------------------|
| KALAMPAKI     | 12/07/19 | 17                              | 301,331     | 0,655 | 65              | 6,023                         |
| KALAMPAKI     | 25/07/19 | 21                              | 302,854     | 0,685 | 65              | 6,023                         |
| KALAMPAKI     | 08/08/19 | 29                              | 303,034     | 0,711 | 65              | 6,023                         |
| KALAMPAKI     | 30/08/19 | 31                              | 303,068     | 0,729 | 65              | 6,023                         |
| KALAMPAKI     | 13/09/19 | 8                               | 301,153     | 0,632 | 65              | 6,023                         |
| KALAMPAKI     | 27/09/19 | 14                              | 301,245     | 0,635 | 65              | 6,023                         |
| KALAMPAKI     | 12/10/19 | 28                              | 303,001     | 0,701 | 65              | 6,023                         |
| EVRIPEDO      | 12/07/19 | 23                              | 307,012     | 0,495 | 133             | 7,011                         |
| EVRIPEDO      | 25/07/19 | 21                              | 307,001     | 0,492 | 133             | 7,011                         |
| EVRIPEDO      | 08/08/19 | 20                              | 306,302     | 0,485 | 133             | 7,011                         |
| EVRIPEDO      | 30/08/19 | 114                             | 307,638     | 0,499 | 133             | 7,011                         |
| EVRIPEDO      | 13/09/19 | 9                               | 302,025     | 0,393 | 133             | 7,011                         |
| EVRIPEDO      | 27/09/19 | 11                              | 302,312     | 0,395 | 133             | 7,011                         |
| EVRIPEDO      | 12/10/19 | 18                              | 303,033     | 0,408 | 133             | 7,011                         |
| KOKKINOGEIA   | 12/07/19 | 6                               | 304,872     | 0,596 | 101             | 3,023                         |
| KOKKINOGEIA   | 25/07/19 | 8                               | 305,744     | 0,601 | 101             | 3,023                         |
| KOKKINOGEIA   | 08/08/19 | 11                              | 305,987     | 0,751 | 101             | 3,023                         |
| KOKKINOGEIA   | 30/08/19 | 9                               | 305,871     | 0,605 | 101             | 3,023                         |
| KOKKINOGEIA   | 13/09/19 | 9                               | 305,911     | 0,624 | 101             | 3,023                         |
| KOKKINOGEIA   | 27/09/19 | 2                               | 300,011     | 0,378 | 101             | 3,023                         |
| KOKKINOGEIA   | 12/10/19 | 2                               | 300,058     | 0,456 | 101             | 3,023                         |
| TOWN OF DRAMA | 12/07/19 | 0                               | 299,563     | 0,576 | 92              | 1,998                         |
| TOWN OF DRAMA | 25/07/19 | 5                               | 307,125     | 0,650 | 92              | 1,998                         |
| TOWN OF DRAMA | 08/08/19 | 7                               | 307,563     | 0,652 | 92              | 1,998                         |
| TOWN OF DRAMA | 30/08/19 | 1                               | 305,711     | 0,613 | 92              | 1,998                         |
| TOWN OF DRAMA | 13/09/19 | 5                               | 307,227     | 0,651 | 92              | 1,998                         |
| TOWN OF DRAMA | 27/09/19 | 0                               | 299,998     | 0,589 | 92              | 1,998                         |
| TOWN OF DRAMA | 12/10/19 | 1                               | 305,800     | 0,625 | 92              | 1,998                         |
| PARANESTI     | 12/07/19 | 4                               | 307,688     | 0,772 | 118             | 1,702                         |
| PARANESTI     | 25/07/19 | 2                               | 307,413     | 0,748 | 118             | 1,702                         |
| PARANESTI     | 08/08/19 | 3                               | 307,635     | 0,770 | 118             | 1,702                         |
| PARANESTI     | 30/08/19 | 1                               | 304,688     | 0,748 | 118             | 1,702                         |
| PARANESTI     | 13/09/19 | 2                               | 307,531     | 0,749 | 118             | 1,702                         |
| PARANESTI     | 27/09/19 | 1                               | 304,653     | 0,742 | 118             | 1,702                         |
| PARANESTI     | 12/10/19 | 1                               | 304,896     | 0,743 | 118             | 1,702                         |
| MAVROBATOS    | 12/07/19 | 4                               | 312,181     | 0,303 | 79              | 1,851                         |
| MAVROBATOS    | 25/07/19 | 0                               | 305,125     | 0,260 | 79              | 1,851                         |
| MAVROBATOS    | 08/08/19 | 6                               | 312,254     | 0,396 | 79              | 1,851                         |
| MAVROBATOS    | 30/08/19 | 3                               | 310,338     | 0,296 | 79              | 1,851                         |
| MAVROBATOS    | 13/09/19 | 1                               | 308,111     | 0,288 | 79              | 1,851                         |
| MAVROBATOS    | 27/09/19 | 1                               | 308,535     | 0,291 | 79              | 1,851                         |
| MAVROBATOS    | 12/10/19 | 0                               | 305,877     | 0,261 | 79              | 1,851                         |

|                             |          |     |         |       |     |       |
|-----------------------------|----------|-----|---------|-------|-----|-------|
| INDUSTRIAL AREA OF<br>DRAMA | 12/07/19 | 11  | 312,676 | 0,619 | 153 | 2,501 |
| INDUSTRIAL AREA OF<br>DRAMA | 25/07/19 | 13  | 312,908 | 0,625 | 153 | 2,501 |
| INDUSTRIAL AREA OF<br>DRAMA | 08/08/19 | 7   | 310,251 | 0,611 | 153 | 2,501 |
| INDUSTRIAL AREA OF<br>DRAMA | 30/08/19 | 3   | 309,952 | 0,603 | 153 | 2,501 |
| INDUSTRIAL AREA OF<br>DRAMA | 13/09/19 | 3   | 309,851 | 0,463 | 153 | 2,501 |
| INDUSTRIAL AREA OF<br>DRAMA | 27/09/19 | 1   | 303,685 | 0,421 | 153 | 2,501 |
| INDUSTRIAL AREA OF<br>DRAMA | 12/10/19 | 1   | 302,340 | 0,401 | 153 | 2,501 |
| EVMOIRO                     | 12/07/19 | 9   | 312,313 | 0,338 | 95  | 4,027 |
| EVMOIRO                     | 25/07/19 | 39  | 312,452 | 0,343 | 95  | 4,027 |
| EVMOIRO                     | 08/08/19 | 6   | 312,219 | 0,331 | 95  | 4,027 |
| EVMOIRO                     | 30/08/19 | 4   | 312,222 | 0,316 | 95  | 4,027 |
| EVMOIRO                     | 13/09/19 | 0   | 301,915 | 0,269 | 95  | 4,027 |
| EVMOIRO                     | 27/09/19 | 3   | 304,932 | 0,304 | 95  | 4,027 |
| EVMOIRO                     | 12/10/19 | 1   | 302,000 | 0,271 | 95  | 4,027 |
| KIPSELI                     | 12/07/19 | 57  | 311,563 | 0,279 | 62  | 6,885 |
| KIPSELI                     | 25/07/19 | 37  | 311,231 | 0,267 | 62  | 6,885 |
| KIPSELI                     | 08/08/19 | 59  | 311,565 | 0,332 | 62  | 6,885 |
| KIPSELI                     | 30/08/19 | 12  | 311,022 | 0,262 | 62  | 6,885 |
| KIPSELI                     | 13/09/19 | 23  | 311,111 | 0,265 | 62  | 6,885 |
| KIPSELI                     | 27/09/19 | 11  | 306,977 | 0,247 | 62  | 6,885 |
| KIPSELI                     | 12/10/19 | 0   | 305,345 | 0,183 | 62  | 6,885 |
| ERASMIO                     | 12/07/19 | 67  | 310,740 | 0,326 | 8   | 7,321 |
| ERASMIO                     | 25/07/19 | 19  | 312,246 | 0,180 | 8   | 7,321 |
| ERASMIO                     | 08/08/19 | 40  | 310,049 | 0,325 | 8   | 7,321 |
| ERASMIO                     | 30/08/19 | 23  | 312,881 | 0,252 | 8   | 7,321 |
| ERASMIO                     | 13/09/19 | 72  | 311,074 | 0,327 | 8   | 7,321 |
| ERASMIO                     | 27/09/19 | 27  | 305,529 | 0,256 | 8   | 7,321 |
| ERASMIO                     | 12/10/19 | 23  | 305,464 | 0,255 | 8   | 7,321 |
| MAGGANA                     | 12/07/19 | 69  | 312,017 | 0,303 | 7   | 9,879 |
| MAGGANA                     | 25/07/19 | 582 | 313,803 | 0,341 | 7   | 9,879 |
| MAGGANA                     | 08/08/19 | 101 | 312,136 | 0,304 | 7   | 9,879 |
| MAGGANA                     | 30/08/19 | 42  | 310,775 | 0,296 | 7   | 9,879 |
| MAGGANA                     | 13/09/19 | 54  | 311,998 | 0,301 | 7   | 9,879 |
| MAGGANA                     | 27/09/19 | 148 | 312,634 | 0,306 | 7   | 9,879 |
| MAGGANA                     | 12/10/19 | 272 | 312,669 | 0,311 | 7   | 9,879 |
| ABDHRA                      | 12/07/19 | 33  | 312,627 | 0,208 | 42  | 9,024 |
| ABDHRA                      | 25/07/19 | 676 | 314,049 | 0,239 | 42  | 9,024 |
| ABDHRA                      | 08/08/19 | 144 | 311,477 | 0,236 | 42  | 9,024 |
| ABDHRA                      | 30/08/19 | 8   | 310,125 | 0,175 | 42  | 9,024 |
| ABDHRA                      | 13/09/19 | 18  | 312,372 | 0,202 | 42  | 9,024 |
| ABDHRA                      | 27/09/19 | 14  | 310,713 | 0,201 | 42  | 9,024 |
| ABDHRA                      | 12/10/19 | 54  | 312,628 | 0,221 | 42  | 9,024 |

|                  |          |      |         |       |    |        |
|------------------|----------|------|---------|-------|----|--------|
| AH GIANNH BEACH  | 12/07/19 | 34   | 308,035 | 0,478 | 4  | 10,012 |
| AH GIANNH BEACH  | 25/07/19 | 1156 | 310,256 | 0,615 | 4  | 10,012 |
| AH GIANNH BEACH  | 08/08/19 | 86   | 309,989 | 0,606 | 4  | 10,012 |
| AH GIANNH BEACH  | 30/08/19 | 43   | 309,876 | 0,576 | 4  | 10,012 |
| AH GIANNH BEACH  | 13/09/19 | 37   | 309,497 | 0,480 | 4  | 10,012 |
| AH GIANNH BEACH  | 27/09/19 | 58   | 309,963 | 0,589 | 4  | 10,012 |
| AH GIANNH BEACH  | 12/10/19 | 109  | 310,011 | 0,611 | 4  | 10,012 |
| PORTO LAGOS      | 12/07/19 | 40   | 311,262 | 0,209 | 2  | 11,563 |
| PORTO LAGOS      | 25/07/19 | 949  | 312,980 | 0,256 | 2  | 11,563 |
| PORTO LAGOS      | 08/08/19 | 735  | 312,880 | 0,237 | 2  | 11,563 |
| PORTO LAGOS      | 30/08/19 | 105  | 312,586 | 0,230 | 2  | 11,563 |
| PORTO LAGOS      | 13/09/19 | 4    | 309,011 | 0,257 | 2  | 11,563 |
| PORTO LAGOS      | 27/09/19 | 31   | 303,724 | 0,208 | 2  | 11,563 |
| PORTO LAGOS      | 12/10/19 | 103  | 311,656 | 0,214 | 2  | 11,563 |
| DIOMHDEIA        | 12/07/19 | 23   | 312,347 | 0,391 | 36 | 5,958  |
| DIOMHDEIA        | 25/07/19 | 83   | 312,410 | 0,419 | 36 | 5,958  |
| DIOMHDEIA        | 08/08/19 | 7    | 308,666 | 0,448 | 36 | 5,958  |
| DIOMHDEIA        | 30/08/19 | 22   | 312,169 | 0,461 | 36 | 5,958  |
| DIOMHDEIA        | 13/09/19 | 8    | 310,587 | 0,472 | 36 | 5,958  |
| DIOMHDEIA        | 27/09/19 | 2    | 306,394 | 0,412 | 36 | 5,958  |
| DIOMHDEIA        | 12/10/19 | 0    | 302,500 | 0,309 | 36 | 5,958  |
| AGIOS ATHANASIOS | 12/07/19 | 0    | 303,256 | 0,371 | 33 | 8,456  |
| AGIOS ATHANASIOS | 25/07/19 | 347  | 313,451 | 0,411 | 33 | 8,456  |
| AGIOS ATHANASIOS | 08/08/19 | 102  | 311,364 | 0,401 | 33 | 8,456  |
| AGIOS ATHANASIOS | 30/08/19 | 135  | 313,359 | 0,405 | 33 | 8,456  |
| AGIOS ATHANASIOS | 13/09/19 | 93   | 310,936 | 0,399 | 33 | 8,456  |
| AGIOS ATHANASIOS | 27/09/19 | 26   | 303,351 | 0,378 | 33 | 8,456  |
| AGIOS ATHANASIOS | 12/10/19 | 48   | 304,335 | 0,388 | 33 | 8,456  |
| KIMMERIA         | 12/07/19 | 0    | 303,056 | 0,224 | 88 | 2,102  |
| KIMMERIA         | 25/07/19 | 0    | 304,047 | 0,239 | 88 | 2,102  |
| KIMMERIA         | 08/08/19 | 6    | 310,100 | 0,252 | 88 | 2,102  |
| KIMMERIA         | 30/08/19 | 8    | 313,094 | 0,256 | 88 | 2,102  |
| KIMMERIA         | 13/09/19 | 3    | 310,025 | 0,245 | 88 | 2,102  |
| KIMMERIA         | 27/09/19 | 4    | 310,052 | 0,250 | 88 | 2,102  |
| KIMMERIA         | 12/10/19 | 1    | 304,896 | 0,241 | 88 | 2,102  |
