# Supplementary material
Source: MDPI journal article supplement (https://www.mdpi.com/2071-1050/13/14/7655)
Supplement: s1 [file s1]

| LST             | ABDHRA                                | AGIOS<br>ATHANASIOS | AH GIANNH<br>BEACH | DIOMHDEIA | ERASMIO | EVMOIRO | EVRIPEDO | INDUSTRIAL<br>AREA OF<br>DRAMA | KALAMPAKI | KIMMERIA | KIPSELI | KOKKINOGEIA | MAGGANA | MAVROBATOS | PARANESTI | PORTO<br>LAGOS | TOWN OF<br>DRAMA |
|-----------------|---------------------------------------|---------------------|--------------------|-----------|---------|---------|----------|--------------------------------|-----------|----------|---------|-------------|---------|------------|-----------|----------------|------------------|
| OBSERVATION DAY | Within-group correlation coefficients |                     |                    |           |         |         |          |                                |           |          |         |             |         |            |           |                |                  |
| 9 DAYS BEFORE   | 0.633                                 | 0.741               | 0.825              | 0.585     | 0.311   | 0.508   | 0.578    | 0.788                          | 0.901     | 0.918    | 0.725   | 0.925       | 0.831   | 0.907      | 0.811     | 0.688          | 0.765            |
| 10 DAYS BEFORE  | 0.641                                 | 0.755               | 0.831              | 0.598     | 0.325   | 0.511   | 0.568    | 0.792                          | 0.905     | 0.918    | 0.731   | 0.928       | 0.835   | 0.914      | 0.815     | 0.691          | 0.771            |
| 11 DAYS BEFORE  | 0.647                                 | 0.764               | 0.831              | 0.599     | 0.328   | 0.521   | 0.561    | 0.799                          | 0.908     | 0.921    | 0.732   | 0.931       | 0.855   | 0.928      | 0.812     | 0.698          | 0.777            |
| 12 DAYS BEFORE  | 0.651                                 | 0.771               | 0.84               | 0.601     | 0.359   | 0.529   | 0.568    | 0.821                          | 0.918     | 0.941    | 0.738   | 0.935       | 0.861   | 0.931      | 0.811     | 0.701          | 0.781            |
| 13 DAYS BEFORE  | 0.655                                 | 0.773               | 0.843              | 0.604     | 0.332   | 0.531   | 0.571    | 0.830                          | 0.921     | 0.943    | 0.744   | 0.950       | 0.866   | 0.937      | 0.837     | 0.704          | 0.787            |
| 14 DAYS BEFORE  | 0.654                                 | 0.771               | 0.841              | 0.603     | 0.331   | 0.524   | 0.581    | 0.825                          | 0.915     | 0.933    | 0.741   | 0.912       | 0.858   | 0.928      | 0.821     | 0.703          | 0.782            |

Table 1: Correlation coefficients of LST at various time lags.

| NDVI            | ABDHRA                                | AGIOS<br>ATHANASIOS | AH GIANNH BEACH | DIOMHDEIA | ERASMIO | EVMOIRO | EVRIPEDO | INDUSTRIAL<br>AREA OF DRAMA | KALAMPAKI | KIMMERIA | KIPSELI | KOKKINOGEIA | MAGGANA | MAVROBATOS | PARANESTI | PORTO<br>LAGOS | TOWN OF<br>DRAMA |
|-----------------|---------------------------------------|---------------------|-----------------|-----------|---------|---------|----------|-----------------------------|-----------|----------|---------|-------------|---------|------------|-----------|----------------|------------------|
| OBSERVATION DAY | Within-group correlation coefficients |                     |                 |           |         |         |          |                             |           |          |         |             |         |            |           |                |                  |
| 9 DAYS BEFORE   | 0.951                                 | 0.965               | 0.711           | 0.205     | 0.307   | 0.631   | 0.563    | 0.788                       | 0.948     | 0.841    | 0.811   | 0.921       | 0.847   | 0.868      | 0.961     | 0.868          | 0.865            |
| 10 DAYS BEFORE  | 0.955                                 | 0.971               | 0.714           | 0.211     | 0.314   | 0.635   | 0.565    | 0.791                       | 0.951     | 0.848    | 0.822   | 0.933       | 0.952   | 0.871      | 0.971     | 0.871          | 0.868            |
| 11 DAYS BEFORE  | 0.966                                 | 0.981               | 0.72            | 0.228     | 0.318   | 0.639   | 0.571    | 0.799                       | 0.955     | 0.855    | 0.828   | 0.938       | 0.953   | 0.887      | 0.974     | 0.878          | 0.874            |
| 12 DAYS BEFORE  | 0.971                                 | 0.988               | 0.721           | 0.231     | 0.311   | 0.641   | 0.574    | 0.802                       | 0.966     | 0.861    | 0.831   | 0.941       | 0.961   | 0.901      | 0.981     | 0.891          | 0.899            |
| 13 DAYS BEFORE  | 0.976                                 | 0.991               | 0.729           | 0.139     | 0.358   | 0.647   | 0.581    | 0.804                       | 0.973     | 0.871    | 0.839   | 0.946       | 0.967   | 0.906      | 0.990     | 0.899          | 0.901            |
| 14 DAYS BEFORE  | 0.972                                 | 0.985               | 0.722           | 0.132     | 0.415   | 0.644   | 0.577    | 0.801                       | 0.961     | 0.865    | 0.832   | 0.942       | 0.954   | 0.899      | 0.985     | 0.892          | 0.887            |

Table 2: Correlation coefficients of NDVI at various time lags.
